# Supplementary material for: Sequencing and de novo transcriptome assembly of Brachypodium sylvaticum (Poaceae)
Source: PubMed Central journal article supplement — Appl Plant Sci. 2013 Mar 5;1(3):apps.1200011. doi: 10.3732/apps.1200011 (PMC4105277; doi:10.3732/apps.1200011), 2013-03-05

**APPENDIX S10.** SSR validation using PCR. We designed primers based on the de novo assemblies of the three *Brachypodium sylvaticum* genotypes and *B. distachyon* genome sequence v1.2. From our sequenced transcriptome assemblies, we identified a putative SSR to be a CTG repeat in contigs Brasy-CorV1T113346, Brasy-EspV1T98857, Brasy-GreV1T116317, and the Bradi5g11660.1 gene locus. We then tested these primers and demonstrated the potential of SSR sequences for use as genetic markers in various *B. sylvaticum* genotypes. Forward: GGAGAAACCAGCACATGAAGTCG and Reverse: GCCGTGCGGAAGTGAAAGGGT primers were used for PCR validation.

50 bp Ladder  
Neg Control  
Spain  
Greece 1  
Greece 2  
Greece 3  
England 1  
England 2  
England 3  
Oregon 1  
Oregon 2  
Oregon 3  
Oregon 4  
Oregon 5  
Oregon 6  
Oregon 7  
Oregon 8  
Oregon 9  
Norway 1  
Norway 2  
Norway 3  
Norway 4  
Macedonia 1  
Macedonia 2  
Macedonia 3  
Macedonia 4  
B. Distachyon  
50 bp Ladder

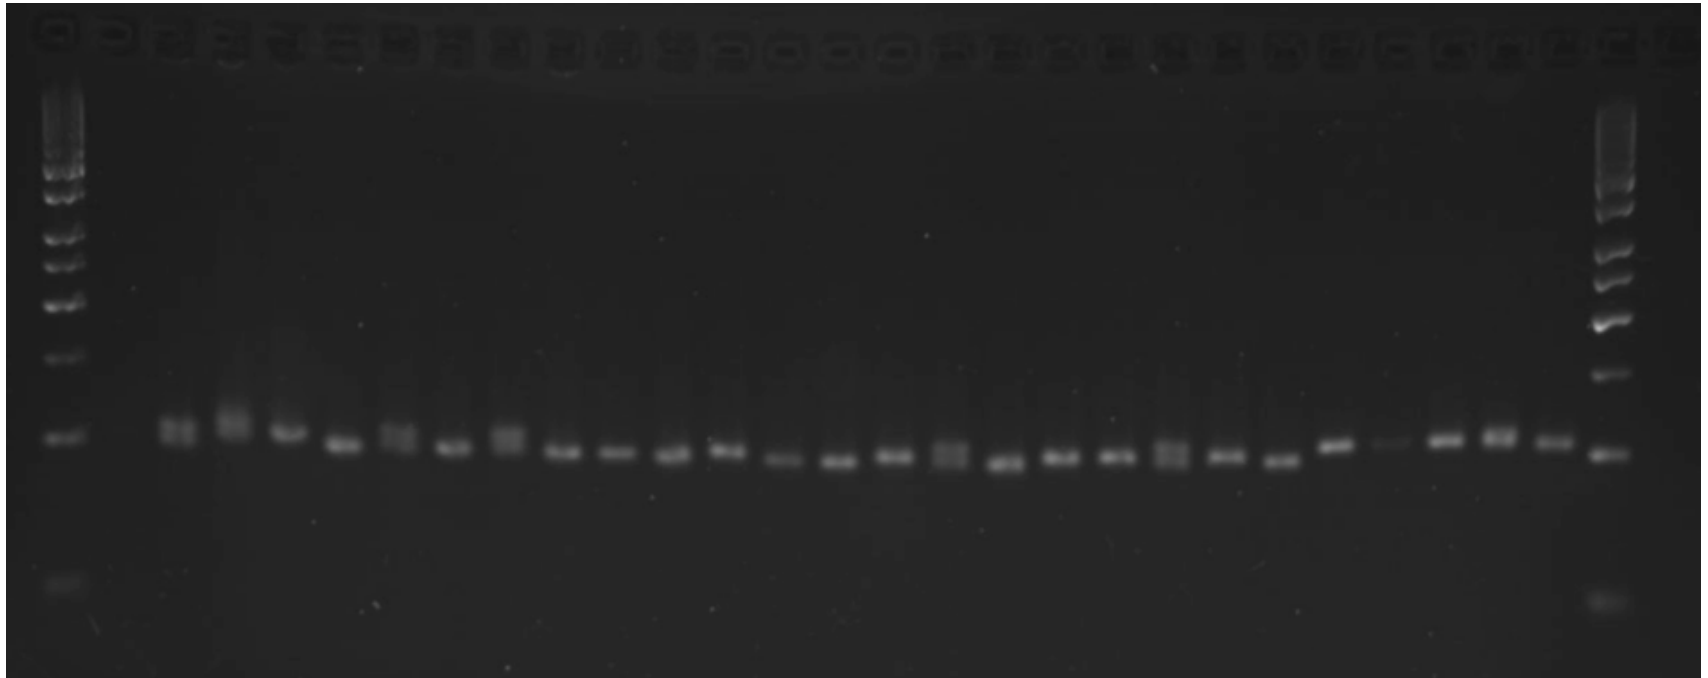

Supplement: apps.1200011_s10.pdf [file apps.1200011_s10.pdf]
